# Supplementary material
Source: Springer Nature journal article supplement (https://www.springerprofessional.de/resource/supplementary/13688_2014_11_MOESM6_ESM.pdf/11893768)

**h-Index error**

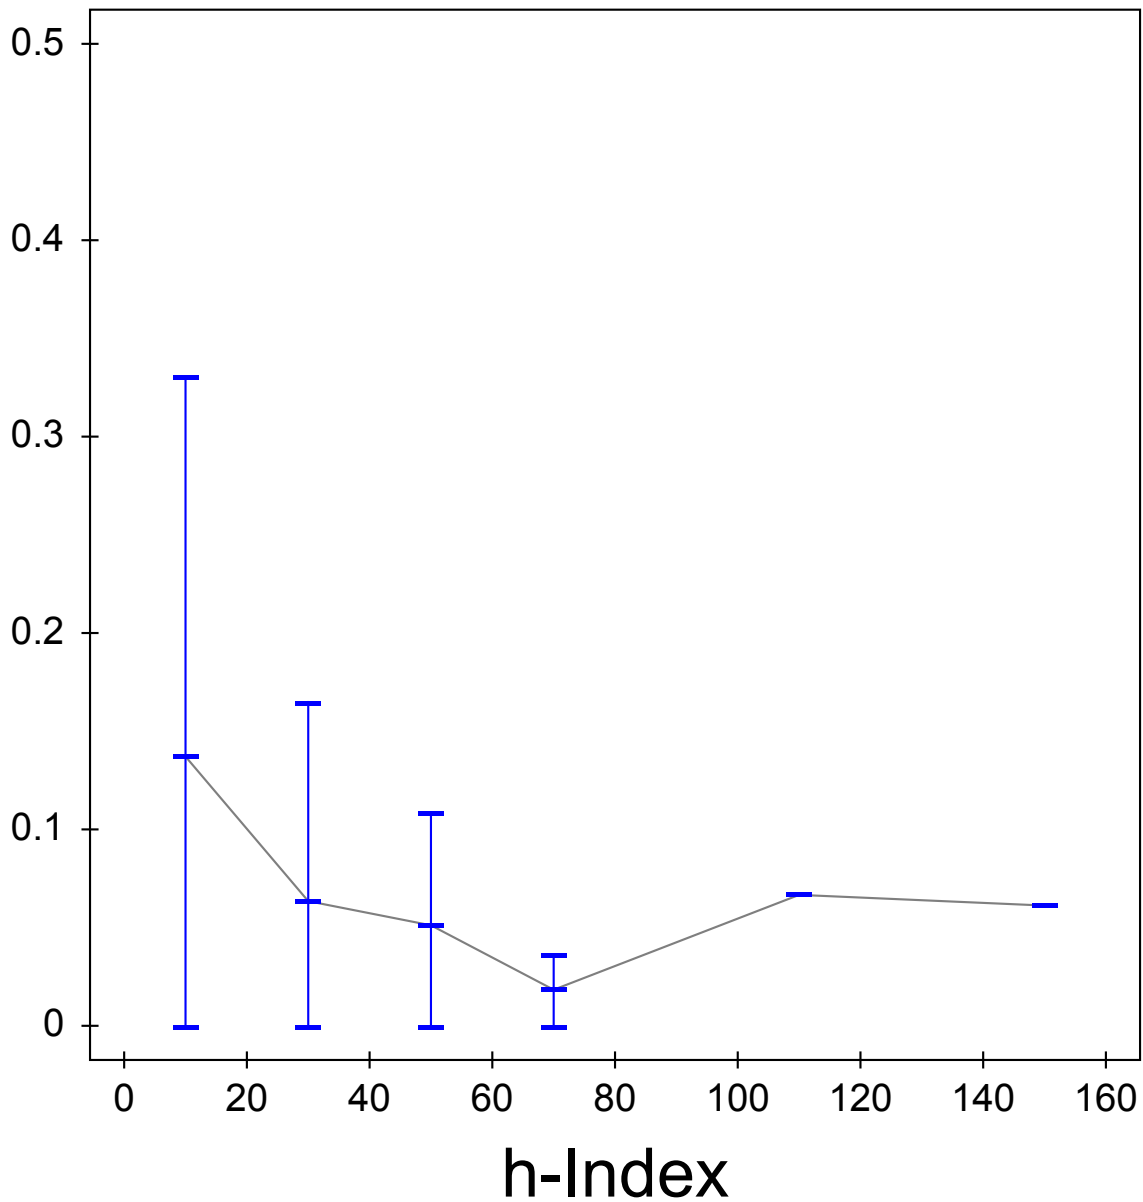

Supplement: MOESM6 [file 11893768]
